# Supplementary material for: Gastroenterologists Adherence to Tumor Necrosis Factor Antagonist Combination Therapy in Inflammatory Bowel Disease
Source: Frontiers journal article supplement (doi:10.3389/fmed.2021.725512), 2021-09-29
Supplement: Data_Sheet_1.PDF [file Data_Sheet_1.PDF]

## Supplementary Documents

**Table (S1): Number and percentage of patients on monotherapy and combination therapy for infliximab stratified by gastroenterologist's age.**

| <b>physicians</b>                                           | <b>Monotherapy<br/>N (%)</b> | <b>Combination<br/>N (%)</b> | <b>Total<br/>N (%)</b> |
|-------------------------------------------------------------|------------------------------|------------------------------|------------------------|
| <b>Senior<br/>gastroenterologists<br/>(age≥45, group D)</b> |                              |                              |                        |
| <b>A</b>                                                    | <b>10 (52.63%)</b>           | <b>9 (47.36%)</b>            | <b>19 (100%)</b>       |
| <b>B</b>                                                    | <b>1 (50%)</b>               | <b>1 (50%)</b>               | <b>2 (100%)</b>        |
| <b>C</b>                                                    | <b>0 (0%)</b>                | <b>2 (100%)</b>              | <b>2 (100%)</b>        |
| <b>D</b>                                                    | <b>4 (40%)</b>               | <b>6 (60%)</b>               | <b>10 (100%)</b>       |
| <b>A</b>                                                    | <b>1 (33.33%)</b>            | <b>2 (66.66%)</b>            | <b>3 (100%)</b>        |
| <b>Total</b>                                                | <b>16 (44.44%)</b>           | <b>20 (55.55%)</b>           | <b>36(100%)</b>        |
| <b>gastroenterologists<br/>(age&lt;45, group C)</b>         |                              |                              |                        |
| <b>E</b>                                                    | <b>1 (20%)</b>               | <b>4 (80%)</b>               | <b>5 (100%)</b>        |
| <b>F</b>                                                    | <b>0 (0%)</b>                | <b>3 (100%)</b>              | <b>3 (100%)</b>        |

|              |                   |                    |                  |
|--------------|-------------------|--------------------|------------------|
| <b>G</b>     | <b>4 (44.44%)</b> | <b>5 (55.5%)</b>   | <b>9 (100%)</b>  |
| <b>H</b>     | <b>2 (40%)</b>    | <b>3 (60%)</b>     | <b>5 (100%)</b>  |
| <b>I</b>     | <b>0 (0%)</b>     | <b>7 (100%)</b>    | <b>7 (100%)</b>  |
| <b>J</b>     | <b>4 (14.28%)</b> | <b>24 (85.71%)</b> | <b>28 (100%)</b> |
| <b>K</b>     | <b>2 (9.09%)</b>  | <b>20 (90.90%)</b> | <b>22 (100%)</b> |
| <b>L</b>     | <b>1 (6.25%)</b>  | <b>15 (93.75%)</b> | <b>16 (100%)</b> |
| <b>M</b>     | <b>3 (50%)</b>    | <b>3 (50%)</b>     | <b>6 (100%)</b>  |
| <b>Total</b> | <b>17 (16.8%)</b> | <b>84 (83%)</b>    | <b>101(100%)</b> |

**Table (S2): Number and percentage of patients on monotherapy and combination therapy for adalimumab stratified by gastroenterologist's age.**

| <b>physicians</b>                                           | <b>Monotherapy<br/>N (%)</b> | <b>Combination<br/>N (%)</b> | <b>Total<br/>N (%)</b> |
|-------------------------------------------------------------|------------------------------|------------------------------|------------------------|
| <b>Senior<br/>gastroenterologists<br/>(age≥45, group D)</b> |                              |                              |                        |
| <b>A</b>                                                    | <b>17 (73.91%)</b>           | <b>6 (26.08%)</b>            | <b>23 (100%)</b>       |
| <b>B</b>                                                    | <b>1 (100%)</b>              | <b>0 (0%)</b>                | <b>1 (100%)</b>        |
| <b>C</b>                                                    | <b>0 (0%)</b>                | <b>0 (0%)</b>                | <b>0 (100%)</b>        |
| <b>D</b>                                                    | <b>12 (80%)</b>              | <b>3 (20%)</b>               | <b>15 (100%)</b>       |
| <b>A</b>                                                    | <b>6 (46.15%)</b>            | <b>7 (53.84%)</b>            | <b>13 (100%)</b>       |
| <b>Total</b>                                                | <b>36 (50%)</b>              | <b>36 (50%)</b>              | <b>52(100%)</b>        |
| <b>gastroenterologists<br/>(age&lt;45, group C)</b>         |                              |                              |                        |
| <b>E</b>                                                    | <b>6 (54.54%)</b>            | <b>5 (45.45%)</b>            | <b>11 (100%)</b>       |
| <b>F</b>                                                    | <b>1 (100%)</b>              | <b>0 (0%)</b>                | <b>1 (100%)</b>        |
| <b>G</b>                                                    | <b>8 (72.72%)</b>            | <b>3 (27.27%)</b>            | <b>11 (100%)</b>       |
| <b>H</b>                                                    | <b>3 (75%)</b>               | <b>1 (25%)</b>               | <b>4 (100%)</b>        |

|              |                   |                    |                  |
|--------------|-------------------|--------------------|------------------|
| <b>I</b>     | <b>5 (71.42%)</b> | <b>2(28.57%)</b>   | <b>7 (100%)</b>  |
| <b>J</b>     | <b>5 (21.73%)</b> | <b>18 (78.26%)</b> | <b>23 (100%)</b> |
| <b>K</b>     | <b>3 (21.42%)</b> | <b>11 (78.57%)</b> | <b>14 (100%)</b> |
| <b>L</b>     | <b>6 (28.57%)</b> | <b>15 (71.42%)</b> | <b>21 (100%)</b> |
| <b>M</b>     | <b>4 (50%)</b>    | <b>4 (50%)</b>     | <b>8 (100%)</b>  |
| <b>Total</b> | <b>41 (41%)</b>   | <b>59 (59%)</b>    | <b>100(100%)</b> |

**Table (S3): Number and percentage of patients on monotherapy and combination therapy for infliximab stratified by inflammatory bowel disease (IBD) interest.**

| <b>physicians</b>                 | <b>Monotherapy<br/>N (%)</b> | <b>Combination<br/>N (%)</b> | <b>Total<br/>N (%)</b> |
|-----------------------------------|------------------------------|------------------------------|------------------------|
| <b>IBD interest<br/>(group A)</b> |                              |                              |                        |
| <b>A</b>                          | <b>1 (6.25%)</b>             | <b>15 (93.75%)</b>           | <b>16 (100%)</b>       |
| <b>B</b>                          | <b>10 (52.63%)</b>           | <b>9 (47.36%)</b>            | <b>19 (100%)</b>       |
| <b>C</b>                          | <b>4 (14.28%)</b>            | <b>24 (85.71%)</b>           | <b>28 (100%)</b>       |
| <b>D</b>                          | <b>2 (9.09%)</b>             | <b>20 (90.90%)</b>           | <b>22 (100%)</b>       |
| <b>Total</b>                      | <b>17 (20%)</b>              | <b>68 (80%)</b>              | <b>85 (100%)</b>       |

| <b>Non-IBD<br/>interest<br/>(group B)</b> |                   |                   |                  |
|-------------------------------------------|-------------------|-------------------|------------------|
| <b>E</b>                                  | <b>0 (0%)</b>     | <b>3 (100%)</b>   | <b>3 (100%)</b>  |
| <b>F</b>                                  | <b>4 (44.44%)</b> | <b>(55.5%)5</b>   | <b>9 (100%)</b>  |
| <b>G</b>                                  | <b>2 (40%)</b>    | <b>3 (60%)</b>    | <b>5 (100%)</b>  |
| <b>H</b>                                  | <b>0 (0%)</b>     | <b>7 (100%)</b>   | <b>7 (100%)</b>  |
| <b>I</b>                                  | <b>1 (50%)</b>    | <b>1 (50%)</b>    | <b>2 (100%)</b>  |
| <b>J</b>                                  | <b>0 (0%)</b>     | <b>2 (100%)</b>   | <b>2 (100%)</b>  |
| <b>K</b>                                  | <b>4 (40%)</b>    | <b>6 (60%)</b>    | <b>10 (100%)</b> |
| <b>L</b>                                  | <b>1 (20%)</b>    | <b>4 (80%)</b>    | <b>5 (100%)</b>  |
| <b>M</b>                                  | <b>1 (33.33%)</b> | <b>2 (66.66%)</b> | <b>3 (100%)</b>  |
| <b>N</b>                                  | <b>3 (50%)</b>    | <b>3 (50%)</b>    | <b>6 (100%)</b>  |
| <b>Total</b>                              | <b>16 (30.7%)</b> | <b>36 (69.2%)</b> | <b>52(100%)</b>  |

**Table (S4): Number and percentage of patients on monotherapy and combination therapy for adalimumab stratified by inflammatory bowel disease (IBD) interest.**

| <b>IBD interest<br/>(group A)</b> | <b>Monotherapy</b> | <b>Combination</b> | <b>Total</b> |
|-----------------------------------|--------------------|--------------------|--------------|
|                                   | <b>N (%)</b>       | <b>N (%)</b>       | <b>N (%)</b> |

|                                           |                    |                    |                  |
|-------------------------------------------|--------------------|--------------------|------------------|
| <b>A</b>                                  | <b>6 (28.57%)</b>  | <b>15 (71.42%)</b> | <b>21 (100%)</b> |
| <b>B</b>                                  | <b>17 (73.91%)</b> | <b>6 (26.08%)</b>  | <b>23 (100%)</b> |
| <b>C</b>                                  | <b>5 (21.73%)</b>  | <b>18 (78.26%)</b> | <b>23 (100%)</b> |
| <b>D</b>                                  | <b>3 (21.42%)</b>  | <b>11 (78.57%)</b> | <b>14 (100%)</b> |
| <b>Total</b>                              | <b>31 (38.27%)</b> | <b>50 (61.7%)</b>  | <b>81(100%)</b>  |
| <b>Non-IBD<br/>interest<br/>(group B)</b> |                    |                    |                  |
| <b>E</b>                                  | <b>1 (100%)</b>    | <b>0 (0%)</b>      | <b>1 (100%)</b>  |
| <b>F</b>                                  | <b>8 (72.72%)</b>  | <b>3 (27.27%)</b>  | <b>11 (100%)</b> |
| <b>G</b>                                  | <b>3 (75%)</b>     | <b>1 (25)</b>      | <b>4 (100%)</b>  |
| <b>H</b>                                  | <b>5 (71.42%)</b>  | <b>2 (28.57%)</b>  | <b>7 (100%)</b>  |
| <b>I</b>                                  | <b>1 (100%)</b>    | <b>0 (0%)</b>      | <b>1 (100%)</b>  |
| <b>J</b>                                  | <b>0 (0%)</b>      | <b>0 (0%)</b>      | <b>0 (100%)</b>  |
| <b>K</b>                                  | <b>12 (80%)</b>    | <b>3 (20%)</b>     | <b>15 (100%)</b> |
| <b>L</b>                                  | <b>6 (54.54%)</b>  | <b>5 (45.45%)</b>  | <b>11 (100%)</b> |
| <b>M</b>                                  | <b>6 (46.15%)</b>  | <b>7 (53.84%)</b>  | <b>13 (100%)</b> |
| <b>N</b>                                  | <b>4 (50%)</b>     | <b>4 (50%)</b>     | <b>8 (100%)</b>  |

|              |                    |                   |                 |
|--------------|--------------------|-------------------|-----------------|
| <b>Total</b> | <b>46 (64.78%)</b> | <b>25 (35.2%)</b> | <b>71(100%)</b> |
|--------------|--------------------|-------------------|-----------------|

**Table (S5): Number of anti-TNF serum concentration and antidrug antibody level tests performed by each physician and per infliximab and adalimumab**

| <b>physicians</b>                 | <b>IFX tests<br/>N (%)</b> | <b>ADL tests<br/>N (%)</b> | <b>Total<br/>N (%)</b> |
|-----------------------------------|----------------------------|----------------------------|------------------------|
| <b>IBD interest<br/>(group A)</b> |                            |                            |                        |
| <b>A</b>                          | <b>19 (13.86%)</b>         | <b>23 (15.1%)</b>          | <b>42(14.53%)</b>      |
| <b>B</b>                          | <b>28 (20.43%)</b>         | <b>23 (15.1%)</b>          | <b>51(17.65%)</b>      |
| <b>C</b>                          | <b>22 (16.05%)</b>         | <b>14 (9.21%)</b>          | <b>36(12.46%)</b>      |
| <b>D</b>                          | <b>16 (11.67%)</b>         | <b>21 (13.81%)</b>         | <b>37(12.80%)</b>      |
| <b>Total</b>                      | <b>85 (51.2%)</b>          | <b>81 (48.79%)</b>         | <b>166 (100%)</b>      |

| <b>Non-IBD interest<br/>(group B)</b> |                    |                    |                   |
|---------------------------------------|--------------------|--------------------|-------------------|
| <b>E</b>                              | <b>5 (3.64%)</b>   | <b>11 (7.23%)</b>  | <b>16 (5.54%)</b> |
| <b>F</b>                              | <b>3 (2.1%)</b>    | <b>1 (0.65%)</b>   | <b>4(1.38%)</b>   |
| <b>G</b>                              | <b>9 (6.56%)</b>   | <b>11 (7.23%)</b>  | <b>20(6.92%)</b>  |
| <b>H</b>                              | <b>5 (3.64%)</b>   | <b>4 (2.63%)</b>   | <b>9(3.11%)</b>   |
| <b>I</b>                              | <b>7 (5.1%)</b>    | <b>7 (4.60%)</b>   | <b>14(4.84%)</b>  |
| <b>J</b>                              | <b>2 (1.45%)</b>   | <b>1 (0.65%)</b>   | <b>3(1.04%)</b>   |
| <b>K</b>                              | <b>2 (1.45%)</b>   | <b>0 (0%)</b>      | <b>2(0.69%)</b>   |
| <b>L</b>                              | <b>10 (7.29%)</b>  | <b>15 (9.86%)</b>  | <b>25(8.65%)</b>  |
| <b>M</b>                              | <b>3 (2.1%)</b>    | <b>13 (8.55%)</b>  | <b>16(5.54%)</b>  |
| <b>N</b>                              | <b>6 (4.37%)</b>   | <b>8 (5.26%)</b>   | <b>14(4.84%)</b>  |
| <b>Total</b>                          | <b>52 (42.27%)</b> | <b>71 (57.72%)</b> | <b>123 (100%)</b> |

ADL: adalimumab, IFX: infliximab
